# Supplementary material for: Photoluminescence of Cis-Polyacetylene Semiconductor Material
Source: MDPI journal article supplement (doi:10.3390/app12062830), 2022-03-09
Supplement: s1 [file s1]

# Photoluminescence of Cis-Polyacetylene Semiconductor Material

Kamrun N. Keya <sup>1</sup>, Mohammed A. Javed <sup>2,†</sup>, Wenjie Xia <sup>1,\*</sup> and Dmitri Kilin <sup>3,\*</sup>

<sup>1</sup> Department of Civil, Construction and Environmental Engineering, North Dakota State University, Fargo, ND 58108, USA; kamrun.keya@ndsu.edu

<sup>2</sup> Department of Chemistry, University of North Dakota, Grand Forks, ND 58202, USA; mohammed.javed@und.edu

<sup>3</sup> Department of Chemistry and Biochemistry, North Dakota State University, Fargo, ND 58108, USA

† Current address: Department of Chemistry, Colorado State University, Fort Collins, CO 80521, USA; mohammed.javed@colostate.edu

\* Correspondence: wenjie.xia@ndsu.edu (W.X.); dmitri.kilin@ndsu.edu (D.K.)

Table S1.: Hole and electron NTOs of the complex OLIG. All NTOs are Calculated using TDDFT on the ground state geometry with PBE functional and LANL2dz/6-31G\* basis set with dichloromethane solvent using CPCM method.

| OLIG                                                            | Hole                                                                                | Electron                                                                             |
|-----------------------------------------------------------------|-------------------------------------------------------------------------------------|--------------------------------------------------------------------------------------|
| S <sub>1</sub><br>E = 1.90 eV<br><i>f</i> =3.7777               |  |  |
| S <sub>4</sub><br>E = 2.67 eV<br><i>f</i> =0.4562               |  |  |
| S <sub>8</sub><br>E = 3.23 eV<br><i>f</i> =0.2856               |  |  |
| S <sub>10</sub><br>E = 3.64 eV<br><i>f</i> =0.0227<br>H/L : 64% |  |  |
| S <sub>11</sub><br>E = 3.71 eV<br><i>f</i> =0.4216              |  |  |

|                                                                                        |                                                                                   |                                                                                    |
|----------------------------------------------------------------------------------------|-----------------------------------------------------------------------------------|------------------------------------------------------------------------------------|
| <p>S<sub>14</sub></p> <p>E = 3.88 eV</p> <p><math>f=0.1393</math></p> <p>H/L : 39%</p> | 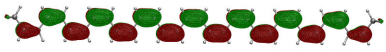 |  |
| <p>S<sub>19</sub></p> <p>E = 4.41 eV</p> <p><math>f=0.0807</math></p> <p>H/L : 33%</p> |  |  |
| <p>S<sub>24</sub></p> <p>E = 4.79 eV</p> <p><math>f=0.2097</math></p>                  |  |  |
